# Supplementary material for: Longitudinal Follow-Up of Bipolar Disorder in Women With Premenstrual Exacerbation: Findings From STEP-BD
Source: Atypon-hosted journal article supplement (doi:10.1176/appi.ajp.2010.09121816), 2011-02-16
Supplement: ajp_168_04_386_01.pdf [file ajp_168_04_386_01.pdf]

## **Core investigators and collaborators for STEP-BD**

STEP-BD Contract: Gary S. Sachs, M.D. (PI), and Michael E. Thase M.D. (Co-PI).  
STEP-BD Clinical Coordinating Center: Gary S. Sachs, M.D., Mark S. Bauer, M.D. (Co-investigator), Jane N. Kogan, Ph.D., Ellen B. Dennehy, Ph.D., Jennifer Harrington, M.A., Jaimie L. Gradus, Mandy Graves, and Elizabeth Walsh. STEP-BD Data Coordinating Center: Stephen Wisniewski, Ph.D. STEP-BD Site Principal Investigators and Co-Principal Investigators (IRBs where patients were recruited are listed in parentheses): Lauren B. Marangell, M.D. and James M. Martinez, M.D. at Baylor College of Medicine (Institutional Review Board for Baylor College of Medicine and Affiliated Hospitals); Joseph R. Calabrese, M.D. and Melvin D. Shelton, M.D. at Case Western Reserve University (University Hospitals of Cleveland Institutional Review Board for Human Investigation); Andrew A. Nierenberg, M.D. and Gary S. Sachs, M.D. at Massachusetts General Hospital and Harvard Medical School (Massachusetts General Hospital Institutional Review Board); R. Bruce Lydiard, M.D. at the Medical University of South Carolina; Joseph F. Goldberg, M.D. at New York Presbyterian Hospital and Weill Medical College of Cornell University (The New York Presbyterian Hospital-Weill Medical College of Cornell University Committee on Human Rights in Research Institutional Review Board); James C.-Y. Chou, M.D. and Joshua Cohen, D.O. at New York University School of Medicine (New York University School of Medicine Institutional Review Board of Research Associates); John Zajecka, M.D. at Rush-Presbyterian St. Luke's Medical Center (Rush-Presbyterian St. Luke's Medical Center Institutional Review Board); Terence A. Ketter, M.D. and Po W. Wang, M.D. at Stanford University School of Medicine (Stanford University Panel on Medical Human Subjects); Uriel Halbreich, M.D. at State University of New York at Buffalo (University at Buffalo State University of New York Health Sciences Institutional Review Board); Alan Gelenberg, M.D. at University of Arizona (Human Subjects Committee (Institutional Review Board) of University of Arizona); Mark Rapaport, M.D. at University of California, San Diego (University of California, San Diego Human Subjects Committee); Marshall Thomas, M.D. and Michael H. Allen, M.D. at University of Colorado Health Sciences Center (Colorado Multiple Institutional Review Board); Rif S. El-Mallakh, M.D. at University of Louisville School of Medicine (University of Louisville Health Sciences Center Human Protection Program Medical Institutional Review Board); Jayendra Patel, M.D. at University of Massachusetts Medical Center (University of Massachusetts Medical Center Committee for the Protection of Human Subjects in Research); Kemal Sagduyu, M.D. at University of Missouri- Kansas City, School of Medicine, Western Missouri Mental Health Center (University of Missouri, Kansas City Adult Health Sciences Institutional Review Board); Mark D. Fossey, M.D. and William R. Yates, M.D. at University of Oklahoma College of Medicine (University of Oklahoma Health Sciences Center Institutional Review Board); Laszlo Gyulai, M.D. and Claudia Baldassano, M.D. at University of Pennsylvania Medical Center (University of Pennsylvania Office of Regulatory Affairs Institutional Review Board); Michael E. Thase, M.D. and Edward S. Friedman, M.D. at University of Pittsburgh Western Psychiatric Institute and Clinic (University of Pittsburgh Institutional Review Board); Peter Hauser, M.D. at Portland VA

Medical Center (Portland Veterans Affairs Medical Center Institutional Review Board); and Charles L. Bowden, M.D. and Cheryl L Gonzales, M.D. at University of Texas Health Science Center at San Antonio (The University of Texas Health Science Center at San Antonio Institutional Review Board) STEP -BD Executive Committee: Mark S. Bauer, M.D., Charles L. Bowden, M.D., Joseph R. Calabrese, M.D., Ellen B. Dennehy, Ph.D., Maurizio Fava, M.D., Gary Gottlieb, M.D., Ellen Frank, Ph.D., Jennifer Harrington, M.A., Terence A. Ketter, M.D., Jane N. Kogan, Ph.D., David Kupfer, M.D., Lauren B. Marangell, M.D., David J. Miklowitz, Ph.D., Michael W. Otto, Ph.D., Jerrold F. Rosenbaum, M.D., Matthew V. Rudorfer, M.D., Gary S. Sachs, M.D., Linda Street, Ph.D., Michael E. Thase, M.D., Sean Ward, and Stephen Wisniewski, Ph.D. NIMH Liaisons to STEP-BD: Matthew V. Rudorfer, M.D., Joanne Severe, M.S., and Linda Street, Ph.D. R. Bruce Lydiard, M.D. at the Medical University of South Carolina; Joseph F. Goldberg, M.D. at New York Presbyterian Hospital and Weill Medical College of Cornell University; John Zajecka, M.D. at Rush-Presbyterian St. Luke's Medical Center; Uriel Halbreich, M.D. at State University of New York at Buffalo; Alan Gelenberg, M.D. at University of Arizona; and Mark Rapaport, M.D. at University of California, San Diego.
